# Supplementary material
Source: PubMed Central journal article supplement (PMC6461906)

## 1    **SUPPLEMENTARY FIGURE LEGENDS**

2

3    **Supplementary Figure 1:** **a**, western blot analyses of p53 acetylation in U2OS cells transfected  
4    with control (siLUC) or different siRNAs against TSPYL2. Transfected cells were treated with  
5    MG132 to stabilize p53 protein levels and then with etoposide to induce p53 acetylation. The fold  
6    induction of acetylated p53 relative to total p53 is indicated. **b**, U2OS cells were transfected with  
7    control (siCTRL), TSPYL2 and CCAR2 siRNAs as indicated. 48hrs later cells were treated or not  
8    with etoposide and p53 acetylation was analyzed by western blot. The fold induction of acetylated  
9    p53 relative to total p53 is shown.

10

11    **Supplementary Fig. 2:** **a**, example of western blot analysis of SIRT1 deacetylation assay  
12    performed in control and TSPYL2 depleted cells. **b**, western blot analyses of p53 acetylation in  
13    TSPYL2 depleted cells treated with MG132 and then with or without the SIRT1 inhibitor  
14    nicotinamide (NAM) and etoposide. The fold induction of acetylated p53 relative to total p53 is  
15    reported. **c**, example of western blot analysis of p300 acetyl-transferase assay performed in control  
16    and TSPYL2 depleted cells. **d**, Example of p300 acetyl-transferase assay performed in U2OS  
17    SIRT1-WT and –KO cells. **e**, Example of p300 acetyl-transferase assay performed in U2OS cells  
18    transfected with control or SIRT1 siRNAs.

19

20    **Supplementary Fig.3:** **a**, SIRT1 was immunoprecipitated from control (siLUC) and SIRT1  
21    silenced cells before and after etoposide treatment. Co-immunoprecipitated p300 was determined by  
22    western blot. IP, immunoprecipitates; PC, negative control; Input, total lysate. **b**, p300 was  
23    immunoprecipitated from siLUC and sip300 cells before and after etoposide. Co-  
24    immunoprecipitated SIRT1 was analyzed by western blot. IP, immunoprecipitates; PC, negative  
25    control; Input, total lysate.

26 **Supplementary Fig. 4:** TSPYL2 was immunoprecipitated from untreated and etoposide treated  
27 cells and analyzed by western blot with general anti-acetyl-lysine antibody. p300 was  
28 immunoprecipitated from etoposide treated cells and used as positive control. IP,  
29 immunoprecipitates; PC, negative control; Input, total lysate.

30

31 **Supplementary Fig. 5:** Western blot analysis of TSPYL2 depletion in siRNAs transfected U2OS  
32 cells used for RT-qPCR analyses (a) and luciferase assays (b).

33

34 **Supplementary Fig.6: a,** U2OS cells were transfected with control or different siRNAs against  
35 TSPYL2. 48hrs later cells were treated with etoposide and the percentage of dead cells was  
36 determined by trypan blue exclusion test 30 hrs after treatment. **b,** U2OS cells were transfected with  
37 control, TSPYL2 and CCAR2 specific siRNAs. The induction of PARP cleavage was evaluated 30  
38 h after etoposide treatment (20μM) by western blot. **c,** control and TSPYL2 silenced U2OS cells  
39 were treated with UV (20J/m<sup>2</sup>) or gemcitabine (10μM). 30 hrs later, the percentage of dead cells  
40 was determined by trypan blue staining.

41

Supplementary Fig. 1

a

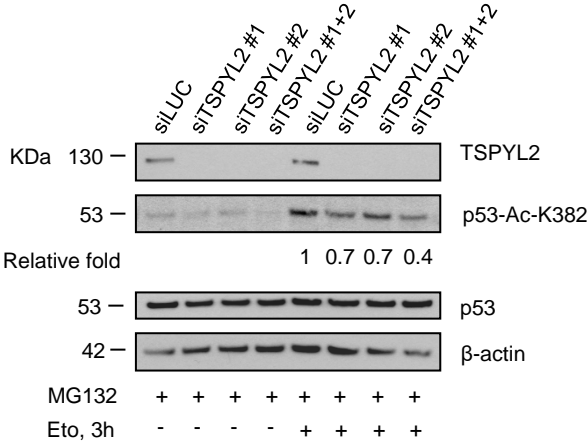

b

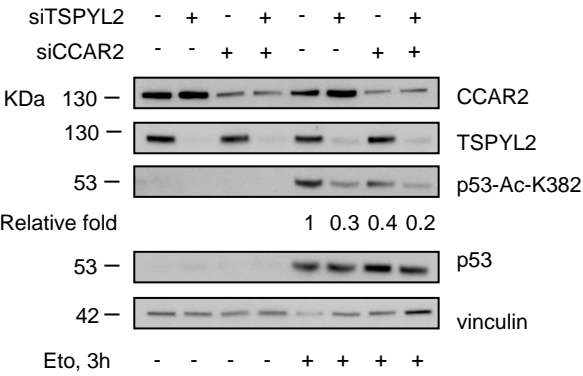

Supplementary Fig. 2

**a**

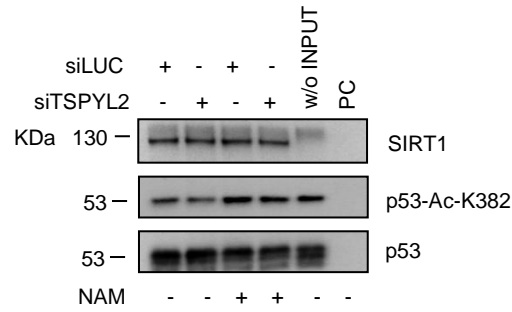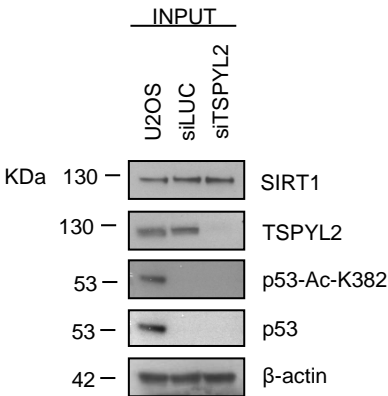

**b**

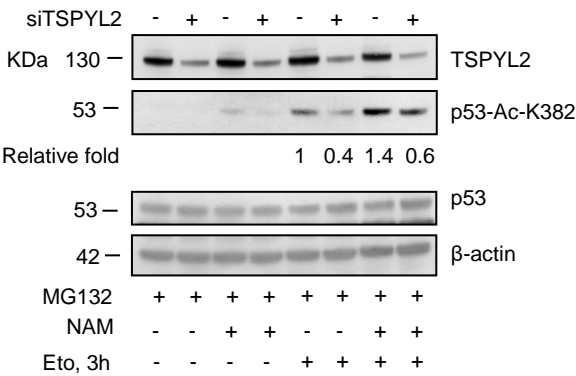

**c**

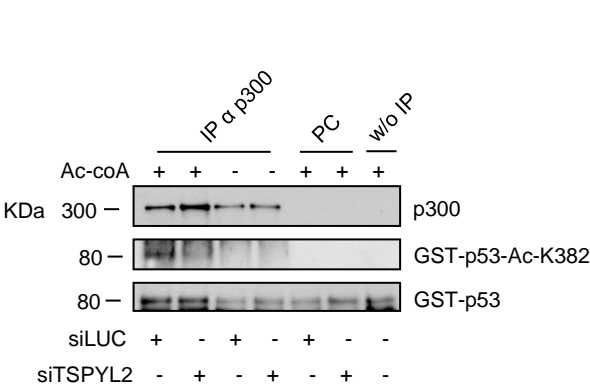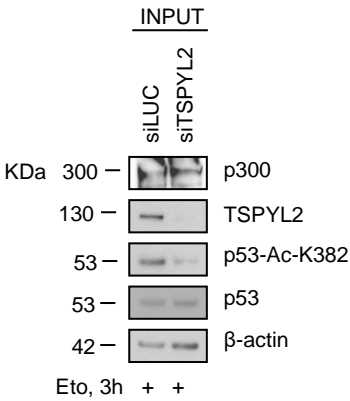

**d**

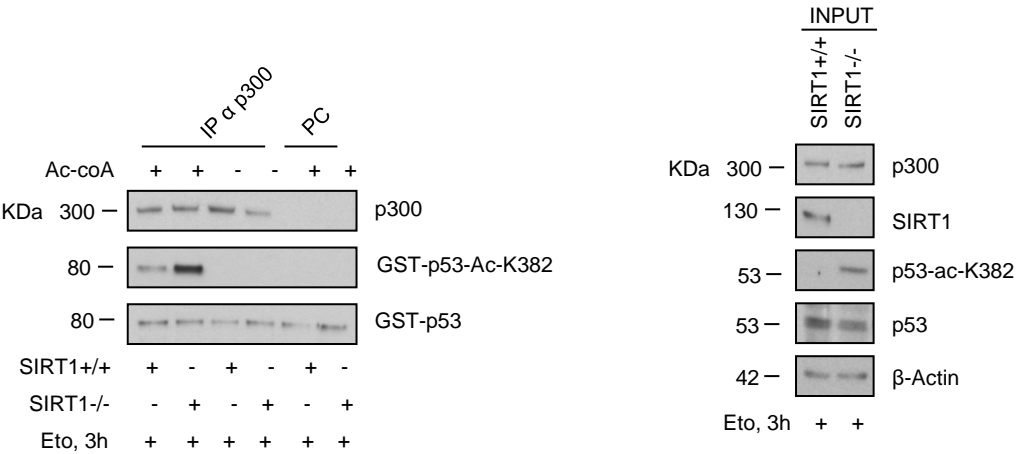

**e**

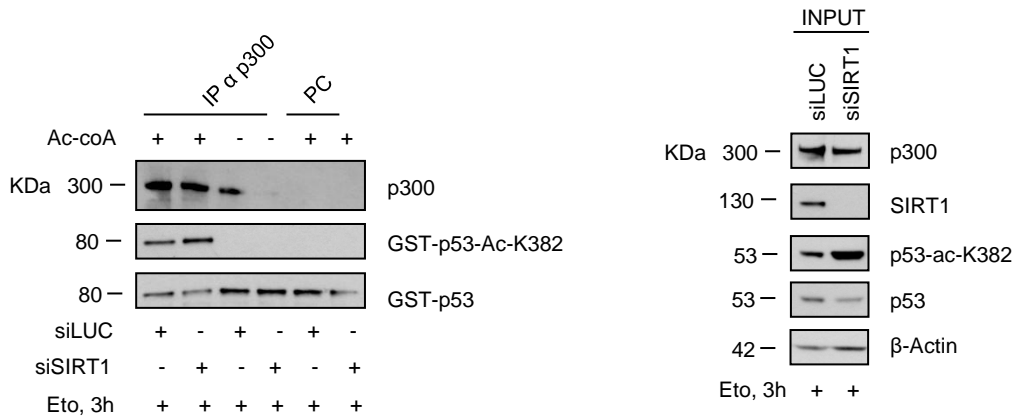

Supplementary Fig. 3

**a**

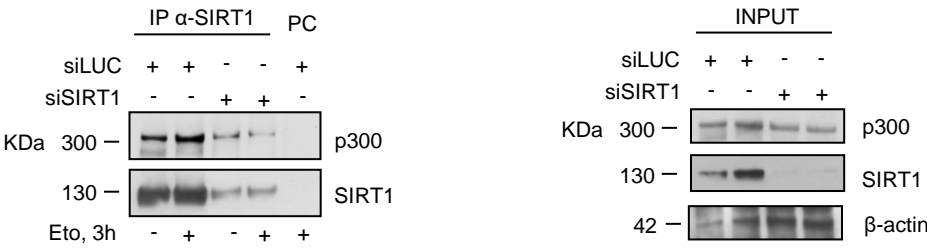

**b**

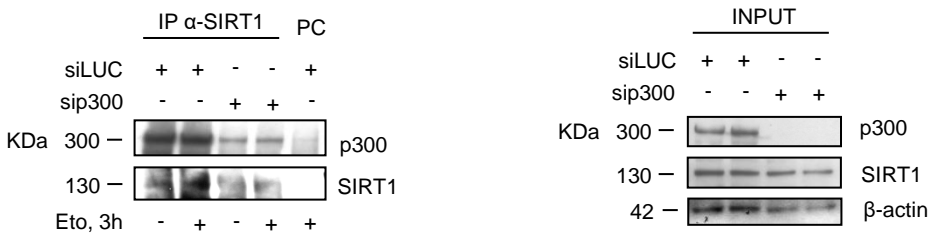

Supplementary Fig. 4

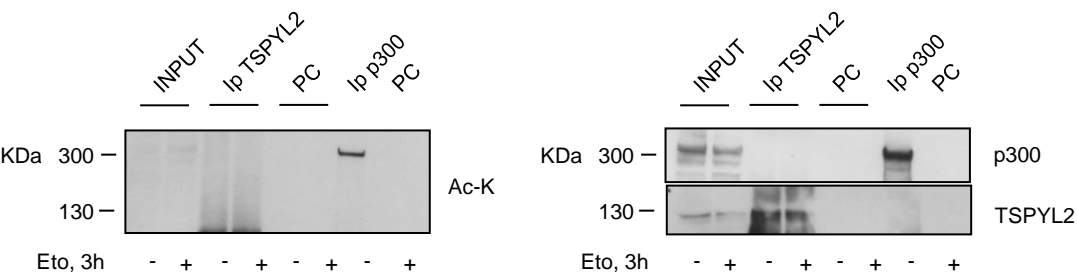

Supplementary Fig. 5

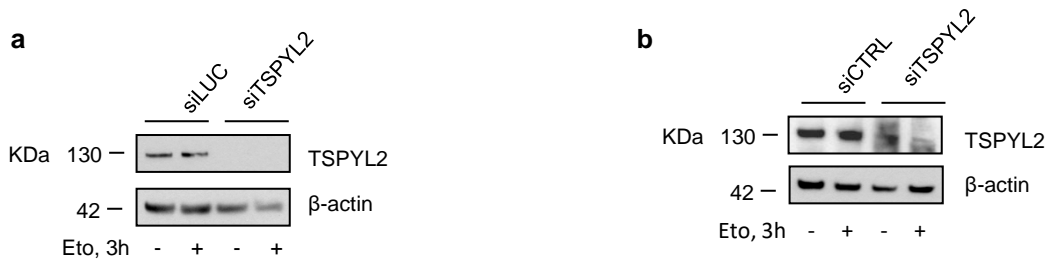

Supplementary Fig. 6

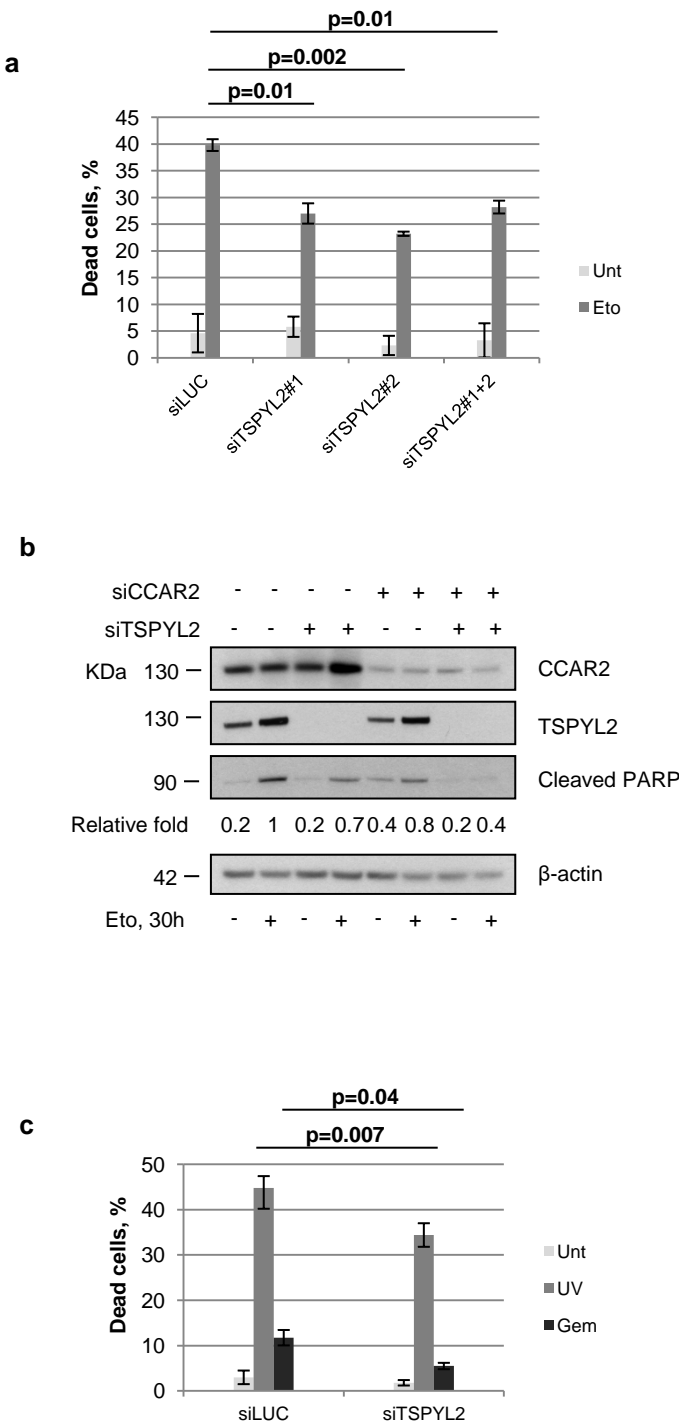

Supplement: 41418_2018_168_MOESM1_ESM.pdf [file 41418_2018_168_MOESM1_ESM.pdf]
